# Supplementary material for: MicroRNA expression profiles differ between primary myofiber of lean and obese pig breeds
Source: PLoS One. 2017 Jul 31;12(7):e0181897. doi: 10.1371/journal.pone.0181897 (PMC5536276; doi:10.1371/journal.pone.0181897)
Supplement: S5 Table — (XLSX) [file pone.0181897.s011.xlsx]

## Sheet: Table S5.1
Table S5.1 GO significant of top 14 upregulated miRNAs
GO ID	Function	GO_term	p-value of Fisher's Exact Test
GO:0005515	molecular_function	protein binding	0
GO:0005634	cellular_component	nucleus	2.22045e-16
GO:0005737	cellular_component	cytoplasm	8.88178e-16
GO:0000166	molecular_function	nucleotide binding	3.36031e-12
GO:0016020	cellular_component	membrane	2.6229e-09
GO:0016772	molecular_function	transferase activity, transferring phosphorus-containing groups	6.56809e-08
GO:0005886	cellular_component	plasma membrane	1.14046e-07
GO:0045944	biological_process	positive regulation of transcription from RNA polymerase II promoter	1.2958e-07
GO:0005488	molecular_function	binding	1.83772e-07
GO:0005739	cellular_component	mitochondrion	2.09321e-07
GO:0016740	molecular_function	transferase activity	2.26217e-07
GO:0016021	cellular_component	integral to membrane	1.02391e-06
GO:0016310	biological_process	phosphorylation	1.58177e-06
GO:0016301	molecular_function	kinase activity	1.80378e-06
GO:0003682	molecular_function	chromatin binding	2.44763e-06
GO:0005794	cellular_component	Golgi apparatus	4.7496e-06
GO:0046872	molecular_function	metal ion binding	9.25917e-06
GO:0004872	molecular_function	receptor activity	1.77373e-05
GO:0045892	biological_process	negative regulation of transcription, DNA-dependent	1.99008e-05
GO:0005829	cellular_component	cytosol	2.18096e-05
GO:0005624	cellular_component	membrane fraction	5.07953e-05
GO:0000122	biological_process	negative regulation of transcription from RNA polymerase II promoter	7.94264e-05
GO:0019899	molecular_function	enzyme binding	8.76477e-05
GO:0016477	biological_process	cell migration	9.66178e-05
GO:0004674	molecular_function	protein serine/threonine kinase activity	0.000114597
GO:0043231	cellular_component	intracellular membrane-bounded organelle	0.000114597
GO:0045893	biological_process	positive regulation of transcription, DNA-dependent	0.000129135
GO:0042472	biological_process	inner ear morphogenesis	0.000171627
GO:0042803	molecular_function	protein homodimerization activity	0.00018739
GO:0030879	biological_process	mammary gland development	0.000237599
GO:0007155	biological_process	cell adhesion	0.000290299
GO:0043234	cellular_component	protein complex	0.000364999
GO:0042802	molecular_function	identical protein binding	0.000377401
GO:0003677	molecular_function	DNA binding	0.00039241
GO:0003779	molecular_function	actin binding	0.000415892
GO:0008152	biological_process	metabolic process	0.000445946
GO:0004713	molecular_function	protein tyrosine kinase activity	0.000484848
GO:0005667	cellular_component	transcription factor complex	0.000583714
GO:0048471	cellular_component	perinuclear region of cytoplasm	0.000737285
GO:0031490	molecular_function	chromatin DNA binding	0.00103758
GO:0030182	biological_process	neuron differentiation	0.00114424
GO:0005178	molecular_function	integrin binding	0.00116521
GO:0000790	cellular_component	nuclear chromatin	0.00116521
GO:0005783	cellular_component	endoplasmic reticulum	0.00119736
GO:0005543	molecular_function	phospholipid binding	0.00122377
GO:0030335	biological_process	positive regulation of cell migration	0.0015128
GO:0006351	biological_process	transcription, DNA-dependent	0.00166629
GO:0003713	molecular_function	transcription coactivator activity	0.00195286
GO:0000902	biological_process	cell morphogenesis	0.00211406
GO:0006913	biological_process	nucleocytoplasmic transport	0.00211406
GO:0005524	molecular_function	ATP binding	0.00222093
GO:0000077	biological_process	DNA damage checkpoint	0.00243264
GO:0045111	cellular_component	intermediate filament cytoskeleton	0.00243264
GO:0017053	cellular_component	transcriptional repressor complex	0.00243264
GO:0019717	cellular_component	synaptosome	0.00250865
GO:0010629	biological_process	negative regulation of gene expression	0.00250865
GO:0050660	molecular_function	flavin adenine dinucleotide binding	0.0025807
GO:0005938	cellular_component	cell cortex	0.00265723
GO:0051592	biological_process	response to calcium ion	0.00267972
GO:0006974	biological_process	response to DNA damage stimulus	0.00268288
GO:0016592	cellular_component	mediator complex	0.00273115
GO:0008134	molecular_function	transcription factor binding	0.00286334
GO:0051082	molecular_function	unfolded protein binding	0.00295524
GO:0015031	biological_process	protein transport	0.00320988
GO:0007157	biological_process	heterophilic cell-cell adhesion	0.00326387
GO:0005977	biological_process	glycogen metabolic process	0.00326387
GO:0000987	molecular_function	core promoter proximal region sequence-specific DNA binding	0.00326387
GO:0016787	molecular_function	hydrolase activity	0.00354153
GO:0016853	molecular_function	isomerase activity	0.00383101
GO:0005887	cellular_component	integral to plasma membrane	0.00401579
GO:0006281	biological_process	DNA repair	0.00401579
GO:0010468	biological_process	regulation of gene expression	0.00420734
GO:0009897	cellular_component	external side of plasma membrane	0.00471443
GO:0007166	biological_process	cell surface receptor signaling pathway	0.00481219
GO:0090103	biological_process	cochlea morphogenesis	0.00528468
GO:0043392	biological_process	negative regulation of DNA binding	0.00528468
GO:0000045	biological_process	autophagic vacuole assembly	0.00528468
GO:0032735	biological_process	positive regulation of interleukin-12 production	0.00528468
GO:0016604	cellular_component	nuclear body	0.00528468
GO:0001889	biological_process	liver development	0.00537275
GO:0005604	cellular_component	basement membrane	0.00537275
GO:0016773	molecular_function	phosphotransferase activity, alcohol group as acceptor	0.00564827
GO:0006810	biological_process	transport	0.00576972
GO:0015991	biological_process	ATP hydrolysis coupled proton transport	0.00586301
GO:0009986	cellular_component	cell surface	0.00603703
GO:0001816	biological_process	cytokine production	0.00620258
GO:0005758	cellular_component	mitochondrial intermembrane space	0.00620258
GO:0030855	biological_process	epithelial cell differentiation	0.00620258
GO:0003995	molecular_function	acyl-CoA dehydrogenase activity	0.00620258
GO:0045786	biological_process	negative regulation of cell cycle	0.00620258
GO:0030217	biological_process	T cell differentiation	0.00620258
GO:0016627	molecular_function	oxidoreductase activity, acting on the CH-CH group of donors	0.00625171
GO:0001503	biological_process	ossification	0.00625171
GO:0042826	molecular_function	histone deacetylase binding	0.00625171
GO:0043065	biological_process	positive regulation of apoptotic process	0.00639294
GO:0006631	biological_process	fatty acid metabolic process	0.00642665
GO:0048469	biological_process	cell maturation	0.00642665
GO:0004714	molecular_function	transmembrane receptor protein tyrosine kinase activity	0.00642665
GO:0006886	biological_process	intracellular protein transport	0.00702811
GO:0043565	molecular_function	sequence-specific DNA binding	0.00743534
GO:0006919	biological_process	activation of cysteine-type endopeptidase activity involved in apoptotic process	0.00752229
GO:0006457	biological_process	protein folding	0.00752881
GO:0016757	molecular_function	transferase activity, transferring glycosyl groups	0.00770653
GO:0008233	molecular_function	peptidase activity	0.00842367
GO:0005578	cellular_component	proteinaceous extracellular matrix	0.00886317
GO:0005576	cellular_component	extracellular region	0.00925458
GO:0001701	biological_process	in utero embryonic development	0.00960309
GO:0004222	molecular_function	metalloendopeptidase activity	0.00994518
GO:0022409	biological_process	positive regulation of cell-cell adhesion	0.0102634
GO:0006796	biological_process	phosphate-containing compound metabolic process	0.0102634
GO:0050678	biological_process	regulation of epithelial cell proliferation	0.0102634
GO:0043537	biological_process	negative regulation of blood vessel endothelial cell migration	0.0102634
GO:0050772	biological_process	positive regulation of axonogenesis	0.0102634
GO:0031432	molecular_function	titin binding	0.0102634
GO:0048730	biological_process	epidermis morphogenesis	0.0102634
GO:0032693	biological_process	negative regulation of interleukin-10 production	0.0102634
GO:0019827	biological_process	stem cell maintenance	0.0102634
GO:0012505	cellular_component	endomembrane system	0.0102634
GO:0043198	cellular_component	dendritic shaft	0.0102634
GO:0006306	biological_process	DNA methylation	0.0102634
GO:0016331	biological_process	morphogenesis of embryonic epithelium	0.0102634
GO:0002224	biological_process	toll-like receptor signaling pathway	0.0102634
GO:0002230	biological_process	positive regulation of defense response to virus by host	0.0102634
GO:0006887	biological_process	exocytosis	0.0102634
GO:0006357	biological_process	regulation of transcription from RNA polymerase II promoter	0.0104418
GO:0007507	biological_process	heart development	0.0105611
GO:0016779	molecular_function	nucleotidyltransferase activity	0.011206
GO:0016746	molecular_function	transferase activity, transferring acyl groups	0.011206
GO:0008237	molecular_function	metallopeptidase activity	0.0117056
GO:0046982	molecular_function	protein heterodimerization activity	0.0117387
GO:0031072	molecular_function	heat shock protein binding	0.0123209
GO:0019901	molecular_function	protein kinase binding	0.0124897
GO:0015629	cellular_component	actin cytoskeleton	0.0125141
GO:0007605	biological_process	sensory perception of sound	0.0125887
GO:0008284	biological_process	positive regulation of cell proliferation	0.0130622
GO:0009411	biological_process	response to UV	0.0139205
GO:0032259	biological_process	methylation	0.0143893
GO:0019915	biological_process	lipid storage	0.0143953
GO:0005765	cellular_component	lysosomal membrane	0.0143953
GO:0000977	molecular_function	RNA polymerase II regulatory region sequence-specific DNA binding	0.0143953
GO:0046966	molecular_function	thyroid hormone receptor binding	0.0143953
GO:0042734	cellular_component	presynaptic membrane	0.0143953
GO:0045765	biological_process	regulation of angiogenesis	0.0143953
GO:0001158	molecular_function	enhancer sequence-specific DNA binding	0.0143953
GO:0045860	biological_process	positive regulation of protein kinase activity	0.0143953
GO:0090190	biological_process	positive regulation of branching involved in ureteric bud morphogenesis	0.0143953
GO:0042391	biological_process	regulation of membrane potential	0.0143953
GO:0005768	cellular_component	endosome	0.0145299
GO:0005730	cellular_component	nucleolus	0.0146754
GO:0001937	biological_process	negative regulation of endothelial cell proliferation	0.0149991
GO:0006289	biological_process	nucleotide-excision repair	0.0149991
GO:0048666	biological_process	neuron development	0.0149991
GO:0017147	molecular_function	Wnt-protein binding	0.0154249
GO:0001102	molecular_function	RNA polymerase II activating transcription factor binding	0.0154249
GO:0035019	biological_process	somatic stem cell maintenance	0.0154249
GO:0051259	biological_process	protein oligomerization	0.0154249
GO:0001708	biological_process	cell fate specification	0.0154249
GO:0034446	biological_process	substrate adhesion-dependent cell spreading	0.0154249
GO:0060173	biological_process	limb development	0.0154249
GO:0005654	cellular_component	nucleoplasm	0.0162503
GO:0042493	biological_process	response to drug	0.016784
GO:0043005	cellular_component	neuron projection	0.016784
GO:0047485	molecular_function	protein N-terminus binding	0.016784
GO:0006468	biological_process	protein phosphorylation	0.0167976
GO:0005615	cellular_component	extracellular space	0.0172472
GO:0043066	biological_process	negative regulation of apoptotic process	0.0188237
GO:0005085	molecular_function	guanyl-nucleotide exchange factor activity	0.0191686
GO:0043410	biological_process	positive regulation of MAPK cascade	0.0195392
GO:0031966	cellular_component	mitochondrial membrane	0.0195392
GO:0016337	biological_process	cell-cell adhesion	0.0195392
GO:0005911	cellular_component	cell-cell junction	0.0226297
GO:0045202	cellular_component	synapse	0.0226297
GO:0008360	biological_process	regulation of cell shape	0.0226297
GO:0005802	cellular_component	trans-Golgi network	0.0226297
GO:0032088	biological_process	negative regulation of NF-kappaB transcription factor activity	0.0226773
GO:0001501	biological_process	skeletal system development	0.0226773
GO:0006629	biological_process	lipid metabolic process	0.0233027
GO:0006508	biological_process	proteolysis	0.0237763
GO:0030424	cellular_component	axon	0.0240426
GO:0008270	molecular_function	zinc ion binding	0.0242154
GO:0004888	molecular_function	transmembrane signaling receptor activity	0.0243852
GO:0007165	biological_process	signal transduction	0.0245034
GO:0035556	biological_process	intracellular signal transduction	0.0254516
GO:0042470	cellular_component	melanosome	0.0261906
GO:0009103	biological_process	lipopolysaccharide biosynthetic process	0.0261906
GO:0019001	molecular_function	guanyl nucleotide binding	0.0261906
GO:0007626	biological_process	locomotory behavior	0.0261906
GO:0005509	molecular_function	calcium ion binding	0.0273353
GO:0003924	molecular_function	GTPase activity	0.0275562
GO:0000139	cellular_component	Golgi membrane	0.0285146
GO:0003700	molecular_function	sequence-specific DNA binding transcription factor activity	0.0287602
GO:0051301	biological_process	cell division	0.0300009
GO:0032755	biological_process	positive regulation of interleukin-6 production	0.0300009
GO:0030218	biological_process	erythrocyte differentiation	0.0300009
GO:0006641	biological_process	triglyceride metabolic process	0.0300009
GO:0016605	cellular_component	PML body	0.0300009
GO:0048705	biological_process	skeletal system morphogenesis	0.0300009
GO:0016192	biological_process	vesicle-mediated transport	0.0308328
GO:0043535	biological_process	regulation of blood vessel endothelial cell migration	0.0322625
GO:0010388	biological_process	cullin deneddylation	0.0322625
GO:0006884	biological_process	cell volume homeostasis	0.0322625
GO:0043616	biological_process	keratinocyte proliferation	0.0322625
GO:0033180	cellular_component	proton-transporting V-type ATPase, V1 domain	0.0322625
GO:0033179	cellular_component	proton-transporting V-type ATPase, V0 domain	0.0322625
GO:0046855	biological_process	inositol phosphate dephosphorylation	0.0322625
GO:0042993	biological_process	positive regulation of transcription factor import into nucleus	0.0322625
GO:0048010	biological_process	vascular endothelial growth factor receptor signaling pathway	0.0322625
GO:0070306	biological_process	lens fiber cell differentiation	0.0322625
GO:0016571	biological_process	histone methylation	0.0322625
GO:0004623	molecular_function	phospholipase A2 activity	0.0322625
GO:2000036	biological_process	regulation of stem cell maintenance	0.0322625
GO:0003674	molecular_function	molecular_function	0.0322625
GO:0006346	biological_process	methylation-dependent chromatin silencing	0.0322625
GO:0005246	molecular_function	calcium channel regulator activity	0.0322625
GO:0033169	biological_process	histone H3-K9 demethylation	0.0322625
GO:2000045	biological_process	regulation of G1/S transition of mitotic cell cycle	0.0322625
GO:0032753	biological_process	positive regulation of interleukin-4 production	0.0322625
GO:0006493	biological_process	protein O-linked glycosylation	0.0322625
GO:0017156	biological_process	calcium ion-dependent exocytosis	0.0322625
GO:0032800	biological_process	receptor biosynthetic process	0.0322625
GO:0070688	cellular_component	MLL5-L complex	0.0322625
GO:0004653	molecular_function	polypeptide N-acetylgalactosaminyltransferase activity	0.0322625
GO:0010763	biological_process	positive regulation of fibroblast migration	0.0322625
GO:0050708	biological_process	regulation of protein secretion	0.0322625
GO:0030332	molecular_function	cyclin binding	0.0322625
GO:0003281	biological_process	ventricular septum development	0.0322625
GO:0061053	biological_process	somite development	0.0322625
GO:0032465	biological_process	regulation of cytokinesis	0.0322625
GO:0050998	molecular_function	nitric-oxide synthase binding	0.0322625
GO:0035098	cellular_component	ESC/E(Z) complex	0.0322625
GO:0032024	biological_process	positive regulation of insulin secretion	0.0322625
GO:0048786	cellular_component	presynaptic active zone	0.0322625
GO:0014047	biological_process	glutamate secretion	0.0322625
GO:0007183	biological_process	SMAD protein complex assembly	0.0322625
GO:0009913	biological_process	epidermal cell differentiation	0.0322625
GO:0031616	cellular_component	spindle pole centrosome	0.0322625
GO:0072107	biological_process	positive regulation of ureteric bud formation	0.0322625
GO:0033261	biological_process	regulation of S phase	0.0322625
GO:0070534	biological_process	protein K63-linked ubiquitination	0.0322625
GO:0050996	biological_process	positive regulation of lipid catabolic process	0.0322625
GO:0060754	biological_process	positive regulation of mast cell chemotaxis	0.0322625
GO:0060216	biological_process	definitive hemopoiesis	0.0322625
GO:0015464	molecular_function	acetylcholine receptor activity	0.0322625
GO:0004439	molecular_function	phosphatidylinositol-4,5-bisphosphate 5-phosphatase activity	0.0322625
GO:0005978	biological_process	glycogen biosynthetic process	0.0322625
GO:0032332	biological_process	positive regulation of chondrocyte differentiation	0.0322625
GO:0032007	biological_process	negative regulation of TOR signaling cascade	0.0322625
GO:0042989	biological_process	sequestering of actin monomers	0.0322625
GO:0071599	biological_process	otic vesicle development	0.0322625
GO:0008022	molecular_function	protein C-terminus binding	0.0336607
GO:0007154	biological_process	cell communication	0.0336607
GO:0030016	cellular_component	myofibril	0.0338696
GO:0043491	biological_process	protein kinase B signaling cascade	0.0338696
GO:0045668	biological_process	negative regulation of osteoblast differentiation	0.0338696
GO:0030426	cellular_component	growth cone	0.0338696
GO:0000792	cellular_component	heterochromatin	0.0338696
GO:0008060	molecular_function	ARF GTPase activator activity	0.0338696
GO:0032312	biological_process	regulation of ARF GTPase activity	0.0338696
GO:0001104	molecular_function	RNA polymerase II transcription cofactor activity	0.0338696
GO:0046854	biological_process	phosphatidylinositol phosphorylation	0.0338696
GO:0045597	biological_process	positive regulation of cell differentiation	0.0338696
GO:0051865	biological_process	protein autoubiquitination	0.0338696
GO:0048538	biological_process	thymus development	0.0338696
GO:0043197	cellular_component	dendritic spine	0.0338696
GO:0009887	biological_process	organ morphogenesis	0.0338757
GO:0005769	cellular_component	early endosome	0.0338757
GO:0016829	molecular_function	lyase activity	0.0338757
GO:0007275	biological_process	multicellular organismal development	0.0343831
GO:0007264	biological_process	small GTPase mediated signal transduction	0.0355608
GO:0007492	biological_process	endoderm development	0.0371719
GO:0002504	biological_process	antigen processing and presentation of peptide or polysaccharide antigen via MHC class II	0.0371719
GO:0007005	biological_process	mitochondrion organization	0.0371719
GO:0009880	biological_process	embryonic pattern specification	0.0371719
GO:0043409	biological_process	negative regulation of MAPK cascade	0.0371719
GO:0042613	cellular_component	MHC class II protein complex	0.0371719
GO:0005643	cellular_component	nuclear pore	0.0371719
GO:0043967	biological_process	histone H4 acetylation	0.0371719
GO:0000413	biological_process	protein peptidyl-prolyl isomerization	0.0371719
GO:0050885	biological_process	neuromuscular process controlling balance	0.0371719
GO:0006259	biological_process	DNA metabolic process	0.0371719
GO:0004857	molecular_function	enzyme inhibitor activity	0.0371719
GO:0048468	biological_process	cell development	0.0371719
GO:0048856	biological_process	anatomical structure development	0.0371719
GO:0006635	biological_process	fatty acid beta-oxidation	0.0371719
GO:0005905	cellular_component	coated pit	0.0371719
GO:0001942	biological_process	hair follicle development	0.0371719
GO:0006874	biological_process	cellular calcium ion homeostasis	0.0374262
GO:0051402	biological_process	neuron apoptotic process	0.0382616
GO:0007435	biological_process	salivary gland morphogenesis	0.0382616
GO:0050930	biological_process	induction of positive chemotaxis	0.0382616
GO:0002009	biological_process	morphogenesis of an epithelium	0.0382616
GO:0045930	biological_process	negative regulation of mitotic cell cycle	0.0382616
GO:0048596	biological_process	embryonic camera-type eye morphogenesis	0.0382616
GO:0006936	biological_process	muscle contraction	0.0382616
GO:0016471	cellular_component	vacuolar proton-transporting V-type ATPase complex	0.0382616
GO:0046856	biological_process	phosphatidylinositol dephosphorylation	0.0382616
GO:0042953	biological_process	lipoprotein transport	0.0382616
GO:0048593	biological_process	camera-type eye morphogenesis	0.0382616
GO:0000398	biological_process	nuclear mRNA splicing, via spliceosome	0.0382616
GO:0050839	molecular_function	cell adhesion molecule binding	0.0382616
GO:0043531	molecular_function	ADP binding	0.0382616
GO:0014032	biological_process	neural crest cell development	0.0382616
GO:0006406	biological_process	mRNA export from nucleus	0.0382616
GO:0016998	biological_process	cell wall macromolecule catabolic process	0.0382616
GO:0016504	molecular_function	peptidase activator activity	0.0382616
GO:0006461	biological_process	protein complex assembly	0.0382616
GO:0033178	cellular_component	proton-transporting two-sector ATPase complex, catalytic domain	0.0382616
GO:0008589	biological_process	regulation of smoothened signaling pathway	0.0382616
GO:0032728	biological_process	positive regulation of interferon-beta production	0.0382616
GO:0016581	cellular_component	NuRD complex	0.0382616
GO:0030099	biological_process	myeloid cell differentiation	0.0382616
GO:0045214	biological_process	sarcomere organization	0.0382616
GO:0030672	cellular_component	synaptic vesicle membrane	0.0382616
GO:0060347	biological_process	heart trabecula formation	0.0382616
GO:0005813	cellular_component	centrosome	0.0389823
GO:0031965	cellular_component	nuclear membrane	0.0403231
GO:0005529	molecular_function	carbohydrate binding	0.0403231
GO:0001666	biological_process	response to hypoxia	0.0403231
GO:0009615	biological_process	response to virus	0.0403231
GO:0008234	molecular_function	cysteine-type peptidase activity	0.040779
GO:0007411	biological_process	axon guidance	0.040779
GO:0019221	biological_process	cytokine-mediated signaling pathway	0.040779
GO:0006955	biological_process	immune response	0.0424104
GO:0050821	biological_process	protein stabilization	0.0443263
GO:0051015	molecular_function	actin filament binding	0.0443263
GO:0007219	biological_process	Notch signaling pathway	0.0443263
GO:0007160	biological_process	cell-matrix adhesion	0.0443263
GO:0030097	biological_process	hemopoiesis	0.0443263
GO:0008026	molecular_function	ATP-dependent helicase activity	0.0452659
GO:0030198	biological_process	extracellular matrix organization	0.0473615
GO:0051897	biological_process	positive regulation of protein kinase B signaling cascade	0.0481072
GO:0007049	biological_process	cell cycle	0.0485827

## Sheet: Table S5.2
Table S5.2 KEGG significant of top 14 upregulated miRNAs
Pathway ID	Pathway Description	p-value of Fisher's Exact Test
ko05145	Toxoplasmosis	3.95748e-06
ko05323	Rheumatoid arthritis	4.1818e-06
ko04110	Cell cycle	7.36735e-05
ko04114	Oocyte meiosis	8.18933e-05
ko05222	Small cell lung cancer	0.000247859
ko04062	Chemokine signaling pathway	0.00026703
ko04210	Apoptosis	0.000326571
ko01100	Metabolic pathways	0.000332978
ko05143	African trypanosomiasis	0.000570485
ko05212	Pancreatic cancer	0.0011875
ko04512	ECM-receptor interaction	0.0014296
ko00270	Cysteine and methionine metabolism	0.00153185
ko05142	Chagas disease (American trypanosomiasis)	0.00166867
ko00510	N-Glycan biosynthesis	0.00196752
ko05140	Leishmaniasis	0.00197901
ko04145	Phagosome	0.00207527
ko05144	Malaria	0.00253776
ko04070	Phosphatidylinositol signaling system	0.00297015
ko04914	Progesterone-mediated oocyte maturation	0.00308399
ko04350	TGF-beta signaling pathway	0.00475191
ko04514	Cell adhesion molecules (CAMs)	0.00494482
ko04142	Lysosome	0.00494482
ko04672	Intestinal immune network for IgA production	0.00583086
ko04510	Focal adhesion	0.00610074
ko04150	mTOR signaling pathway	0.00670964
ko04966	Collecting duct acid secretion	0.0105932
ko05146	Amoebiasis	0.0107011
ko04620	Toll-like receptor signaling pathway	0.0146702
ko00562	Inositol phosphate metabolism	0.0158292
ko04666	Fc gamma R-mediated phagocytosis	0.0160095
ko04115	p53 signaling pathway	0.0161491
ko04930	Type II diabetes mellitus	0.0217565
ko05200	Pathways in cancer	0.0223892
ko03420	Nucleotide excision repair	0.0230252
ko03060	Protein export	0.030449
ko05220	Chronic myeloid leukemia	0.031933
ko04130	SNARE interactions in vesicular transport	0.0333914
ko04621	NOD-like receptor signaling pathway	0.0352196
ko05330	Allograft rejection	0.0352196
ko04940	Type I diabetes mellitus	0.0353673
ko04060	Cytokine-cytokine receptor interaction	0.0362096
ko04660	T cell receptor signaling pathway	0.0436107
ko04141	Protein processing in endoplasmic reticulum	0.0438223
ko00052	Galactose metabolism	0.0444095
ko05412	Arrhythmogenic right ventricular cardiomyopathy (ARVC)	0.0465199

## Sheet: Table S5.3
Table S5.3 GO significant of top 36 downregulated miRNAs
GO ID	Function	GO_term	p-value of Fisher's Exact Test
GO:0005515	molecular_function	protein binding	0
GO:0005634	cellular_component	nucleus	1.58225e-19
GO:0005737	cellular_component	cytoplasm	1.33227e-15
GO:0016020	cellular_component	membrane	3.1621e-15
GO:0005886	cellular_component	plasma membrane	1.44733e-14
GO:0000166	molecular_function	nucleotide binding	1.63701e-13
GO:0005488	molecular_function	binding	6.28298e-12
GO:0016021	cellular_component	integral to membrane	9.79626e-12
GO:0005739	cellular_component	mitochondrion	1.15853e-09
GO:0016740	molecular_function	transferase activity	3.53016e-09
GO:0016772	molecular_function	transferase activity, transferring phosphorus-containing groups	4.11429e-09
GO:0005794	cellular_component	Golgi apparatus	5.19898e-09
GO:0016310	biological_process	phosphorylation	2.96461e-08
GO:0004872	molecular_function	receptor activity	5.29112e-08
GO:0016301	molecular_function	kinase activity	5.57108e-08
GO:0046872	molecular_function	metal ion binding	7.05426e-08
GO:0045944	biological_process	positive regulation of transcription from RNA polymerase II promoter	8.03946e-07
GO:0009897	cellular_component	external side of plasma membrane	2.7894e-06
GO:0006810	biological_process	transport	3.26967e-06
GO:0005887	cellular_component	integral to plasma membrane	4.77667e-06
GO:0019899	molecular_function	enzyme binding	6.17408e-06
GO:0042802	molecular_function	identical protein binding	2.63866e-05
GO:0031966	cellular_component	mitochondrial membrane	2.70648e-05
GO:0004674	molecular_function	protein serine/threonine kinase activity	2.87901e-05
GO:0005783	cellular_component	endoplasmic reticulum	3.27651e-05
GO:0003682	molecular_function	chromatin binding	3.28654e-05
GO:0016787	molecular_function	hydrolase activity	3.60339e-05
GO:0045893	biological_process	positive regulation of transcription, DNA-dependent	6.02878e-05
GO:0016746	molecular_function	transferase activity, transferring acyl groups	6.34376e-05
GO:0005576	cellular_component	extracellular region	9.47625e-05
GO:0004713	molecular_function	protein tyrosine kinase activity	0.000127285
GO:0005178	molecular_function	integrin binding	0.000147519
GO:0005667	cellular_component	transcription factor complex	0.000161412
GO:0045892	biological_process	negative regulation of transcription, DNA-dependent	0.00017005
GO:0043231	cellular_component	intracellular membrane-bounded organelle	0.000172873
GO:0051592	biological_process	response to calcium ion	0.000182377
GO:0016477	biological_process	cell migration	0.000199323
GO:0003713	molecular_function	transcription coactivator activity	0.000211033
GO:0005624	cellular_component	membrane fraction	0.000227669
GO:0003779	molecular_function	actin binding	0.000253386
GO:0008134	molecular_function	transcription factor binding	0.000274327
GO:0001558	biological_process	regulation of cell growth	0.000339984
GO:0042803	molecular_function	protein homodimerization activity	0.00036956
GO:0005615	cellular_component	extracellular space	0.000392031
GO:0001666	biological_process	response to hypoxia	0.000411529
GO:0009986	cellular_component	cell surface	0.000415139
GO:0001708	biological_process	cell fate specification	0.000428403
GO:0005829	cellular_component	cytosol	0.000510611
GO:0031410	cellular_component	cytoplasmic vesicle	0.000631031
GO:0048471	cellular_component	perinuclear region of cytoplasm	0.000673972
GO:0008152	biological_process	metabolic process	0.0010571
GO:0030879	biological_process	mammary gland development	0.00106975
GO:0042472	biological_process	inner ear morphogenesis	0.00110984
GO:0008234	molecular_function	cysteine-type peptidase activity	0.00119155
GO:0007155	biological_process	cell adhesion	0.00119952
GO:0008233	molecular_function	peptidase activity	0.00130629
GO:0008237	molecular_function	metallopeptidase activity	0.00132395
GO:0005516	molecular_function	calmodulin binding	0.00141763
GO:0047485	molecular_function	protein N-terminus binding	0.0016849
GO:0030018	cellular_component	Z disc	0.0019066
GO:0006886	biological_process	intracellular protein transport	0.00202425
GO:0016853	molecular_function	isomerase activity	0.00208293
GO:0001701	biological_process	in utero embryonic development	0.00227479
GO:0051082	molecular_function	unfolded protein binding	0.00231258
GO:0050821	biological_process	protein stabilization	0.00237277
GO:0000209	biological_process	protein polyubiquitination	0.00237277
GO:0035556	biological_process	intracellular signal transduction	0.00252773
GO:0005543	molecular_function	phospholipid binding	0.00255229
GO:0016779	molecular_function	nucleotidyltransferase activity	0.00290376
GO:0003677	molecular_function	DNA binding	0.00295861
GO:0004190	molecular_function	aspartic-type endopeptidase activity	0.00298256
GO:0050714	biological_process	positive regulation of protein secretion	0.00298256
GO:0042734	cellular_component	presynaptic membrane	0.00298256
GO:0045765	biological_process	regulation of angiogenesis	0.00298256
GO:0031490	molecular_function	chromatin DNA binding	0.00298256
GO:0015031	biological_process	protein transport	0.00317244
GO:0006955	biological_process	immune response	0.00327442
GO:0006629	biological_process	lipid metabolic process	0.00363415
GO:0005524	molecular_function	ATP binding	0.00365335
GO:0032755	biological_process	positive regulation of interleukin-6 production	0.00388831
GO:0008610	biological_process	lipid biosynthetic process	0.00388831
GO:0007268	biological_process	synaptic transmission	0.00388831
GO:0005520	molecular_function	insulin-like growth factor binding	0.00388831
GO:0004714	molecular_function	transmembrane receptor protein tyrosine kinase activity	0.00388831
GO:0016605	cellular_component	PML body	0.00388831
GO:0048705	biological_process	skeletal system morphogenesis	0.00388831
GO:0004888	molecular_function	transmembrane signaling receptor activity	0.00415049
GO:0016491	molecular_function	oxidoreductase activity	0.00440897
GO:0007275	biological_process	multicellular organismal development	0.00491985
GO:0000122	biological_process	negative regulation of transcription from RNA polymerase II promoter	0.00493993
GO:0042826	molecular_function	histone deacetylase binding	0.00499178
GO:0030501	biological_process	positive regulation of bone mineralization	0.00584583
GO:0006457	biological_process	protein folding	0.00584884
GO:0017147	molecular_function	Wnt-protein binding	0.00604536
GO:0035019	biological_process	somatic stem cell maintenance	0.00604536
GO:0051259	biological_process	protein oligomerization	0.00604536
GO:0005876	cellular_component	spindle microtubule	0.00604536
GO:0006508	biological_process	proteolysis	0.00618021
GO:0016337	biological_process	cell-cell adhesion	0.00647045
GO:0007050	biological_process	cell cycle arrest	0.00647045
GO:0007166	biological_process	cell surface receptor signaling pathway	0.00659504
GO:0019901	molecular_function	protein kinase binding	0.00684897
GO:0030182	biological_process	neuron differentiation	0.00689867
GO:0005506	molecular_function	iron ion binding	0.00704487
GO:0030198	biological_process	extracellular matrix organization	0.00717094
GO:0050660	molecular_function	flavin adenine dinucleotide binding	0.00717094
GO:0031072	molecular_function	heat shock protein binding	0.00730047
GO:0045121	cellular_component	membrane raft	0.00733234
GO:0000139	cellular_component	Golgi membrane	0.00733234
GO:0007435	biological_process	salivary gland morphogenesis	0.00786652
GO:0007157	biological_process	heterophilic cell-cell adhesion	0.00786652
GO:0006936	biological_process	muscle contraction	0.00786652
GO:0016471	cellular_component	vacuolar proton-transporting V-type ATPase complex	0.00786652
GO:0042953	biological_process	lipoprotein transport	0.00786652
GO:0045095	cellular_component	keratin filament	0.00786652
GO:0010634	biological_process	positive regulation of epithelial cell migration	0.00786652
GO:0043531	molecular_function	ADP binding	0.00786652
GO:0005977	biological_process	glycogen metabolic process	0.00786652
GO:0008589	biological_process	regulation of smoothened signaling pathway	0.00786652
GO:0090305	biological_process	nucleic acid phosphodiester bond hydrolysis	0.00786652
GO:0016581	cellular_component	NuRD complex	0.00786652
GO:0021510	biological_process	spinal cord development	0.00786652
GO:0000151	cellular_component	ubiquitin ligase complex	0.00850727
GO:0000077	biological_process	DNA damage checkpoint	0.00850727
GO:0045111	cellular_component	intermediate filament cytoskeleton	0.00850727
GO:0017053	cellular_component	transcriptional repressor complex	0.00850727
GO:0005730	cellular_component	nucleolus	0.00872969
GO:0006974	biological_process	response to DNA damage stimulus	0.0102397
GO:0007389	biological_process	pattern specification process	0.0103076
GO:0008285	biological_process	negative regulation of cell proliferation	0.0109693
GO:0007283	biological_process	spermatogenesis	0.0111923
GO:0004222	molecular_function	metalloendopeptidase activity	0.0111923
GO:0043065	biological_process	positive regulation of apoptotic process	0.0114661
GO:0042110	biological_process	T cell activation	0.0115393
GO:0007219	biological_process	Notch signaling pathway	0.0115393
GO:0007605	biological_process	sensory perception of sound	0.0115393
GO:0043565	molecular_function	sequence-specific DNA binding	0.0115434
GO:0010468	biological_process	regulation of gene expression	0.011642
GO:0005938	cellular_component	cell cortex	0.0123184
GO:0006874	biological_process	cellular calcium ion homeostasis	0.0123184
GO:0006816	biological_process	calcium ion transport	0.0124185
GO:0016773	molecular_function	phosphotransferase activity, alcohol group as acceptor	0.0124185
GO:0051092	biological_process	positive regulation of NF-kappaB transcription factor activity	0.0127039
GO:0005085	molecular_function	guanyl-nucleotide exchange factor activity	0.0127039
GO:0019717	cellular_component	synaptosome	0.0127486
GO:0016820	molecular_function	hydrolase activity, acting on acid anhydrides, catalyzing transmembrane movement of substances	0.0127486
GO:0005911	cellular_component	cell-cell junction	0.0128825
GO:0045202	cellular_component	synapse	0.0128825
GO:0006913	biological_process	nucleocytoplasmic transport	0.0128825
GO:0030154	biological_process	cell differentiation	0.013652
GO:0007165	biological_process	signal transduction	0.0136657
GO:0007005	biological_process	mitochondrion organization	0.0140948
GO:0090103	biological_process	cochlea morphogenesis	0.0140948
GO:0021904	biological_process	dorsal/ventral neural tube patterning	0.0140948
GO:0043542	biological_process	endothelial cell migration	0.0140948
GO:0000045	biological_process	autophagic vacuole assembly	0.0140948
GO:0006259	biological_process	DNA metabolic process	0.0140948
GO:0022008	biological_process	neurogenesis	0.0140948
GO:0048468	biological_process	cell development	0.0140948
GO:0007040	biological_process	lysosome organization	0.0140948
GO:0032735	biological_process	positive regulation of interleukin-12 production	0.0140948
GO:0045785	biological_process	positive regulation of cell adhesion	0.0140948
GO:0016604	cellular_component	nuclear body	0.0140948
GO:0005578	cellular_component	proteinaceous extracellular matrix	0.0144784
GO:0006357	biological_process	regulation of transcription from RNA polymerase II promoter	0.0153368
GO:0030054	cellular_component	cell junction	0.016223
GO:0005768	cellular_component	endosome	0.0171315
GO:0001816	biological_process	cytokine production	0.0182537
GO:0043491	biological_process	protein kinase B signaling cascade	0.0182537
GO:0016049	biological_process	cell growth	0.0182537
GO:0045668	biological_process	negative regulation of osteoblast differentiation	0.0182537
GO:0000792	cellular_component	heterochromatin	0.0182537
GO:0030855	biological_process	epithelial cell differentiation	0.0182537
GO:0030175	cellular_component	filopodium	0.0182537
GO:0042254	biological_process	ribosome biogenesis	0.0182537
GO:0016209	molecular_function	antioxidant activity	0.0182537
GO:0048646	biological_process	anatomical structure formation involved in morphogenesis	0.0182537
GO:0045786	biological_process	negative regulation of cell cycle	0.0182537
GO:0030217	biological_process	T cell differentiation	0.0182537
GO:0016757	molecular_function	transferase activity, transferring glycosyl groups	0.0189783
GO:0006200	biological_process	ATP catabolic process	0.0189783
GO:0016324	cellular_component	apical plasma membrane	0.0189783
GO:0006915	biological_process	apoptotic process	0.0191541
GO:0005789	cellular_component	endoplasmic reticulum membrane	0.0191541
GO:0006468	biological_process	protein phosphorylation	0.0195542
GO:0030424	cellular_component	axon	0.0198884
GO:0031012	cellular_component	extracellular matrix	0.0206783
GO:0031464	cellular_component	Cul4A-RING ubiquitin ligase complex	0.0207424
GO:0033631	biological_process	cell-cell adhesion mediated by integrin	0.0207424
GO:0042542	biological_process	response to hydrogen peroxide	0.0207424
GO:0001578	biological_process	microtubule bundle formation	0.0207424
GO:0006044	biological_process	N-acetylglucosamine metabolic process	0.0207424
GO:0022409	biological_process	positive regulation of cell-cell adhesion	0.0207424
GO:0016409	molecular_function	palmitoyltransferase activity	0.0207424
GO:0034612	biological_process	response to tumor necrosis factor	0.0207424
GO:0051899	biological_process	membrane depolarization	0.0207424
GO:0006796	biological_process	phosphate-containing compound metabolic process	0.0207424
GO:0050678	biological_process	regulation of epithelial cell proliferation	0.0207424
GO:0043537	biological_process	negative regulation of blood vessel endothelial cell migration	0.0207424
GO:0050772	biological_process	positive regulation of axonogenesis	0.0207424
GO:0031432	molecular_function	titin binding	0.0207424
GO:0031091	cellular_component	platelet alpha granule	0.0207424
GO:0048730	biological_process	epidermis morphogenesis	0.0207424
GO:0032693	biological_process	negative regulation of interleukin-10 production	0.0207424
GO:0012505	cellular_component	endomembrane system	0.0207424
GO:0043198	cellular_component	dendritic shaft	0.0207424
GO:0016331	biological_process	morphogenesis of embryonic epithelium	0.0207424
GO:0018345	biological_process	protein palmitoylation	0.0207424
GO:0002224	biological_process	toll-like receptor signaling pathway	0.0207424
GO:0005761	cellular_component	mitochondrial ribosome	0.0207424
GO:0002230	biological_process	positive regulation of defense response to virus by host	0.0207424
GO:0048565	biological_process	digestive tract development	0.0207424
GO:0006887	biological_process	exocytosis	0.0207424
GO:0001662	biological_process	behavioral fear response	0.0207424
GO:0048741	biological_process	skeletal muscle fiber development	0.0207424
GO:0003857	molecular_function	3-hydroxyacyl-CoA dehydrogenase activity	0.0207424
GO:0016580	cellular_component	Sin3 complex	0.0207424
GO:0006911	biological_process	phagocytosis, engulfment	0.0207424
GO:0045333	biological_process	cellular respiration	0.0207424
GO:0021915	biological_process	neural tube development	0.0208245
GO:0006631	biological_process	fatty acid metabolic process	0.0208245
GO:0048469	biological_process	cell maturation	0.0208245
GO:0016798	molecular_function	hydrolase activity, acting on glycosyl bonds	0.0208245
GO:0005769	cellular_component	early endosome	0.0215655
GO:0016829	molecular_function	lyase activity	0.0215655
GO:0055114	biological_process	oxidation-reduction process	0.0220613
GO:0032259	biological_process	methylation	0.0222577
GO:0031965	cellular_component	nuclear membrane	0.0222577
GO:0045766	biological_process	positive regulation of angiogenesis	0.0222577
GO:0016627	molecular_function	oxidoreductase activity, acting on the CH-CH group of donors	0.0222681
GO:0019001	molecular_function	guanyl nucleotide binding	0.0222681
GO:0002053	biological_process	positive regulation of mesenchymal cell proliferation	0.0222681
GO:0007626	biological_process	locomotory behavior	0.0222681
GO:0051726	biological_process	regulation of cell cycle	0.0227772
GO:0071013	cellular_component	catalytic step 2 spliceosome	0.0227772
GO:0007229	biological_process	integrin-mediated signaling pathway	0.0229262
GO:0000790	cellular_component	nuclear chromatin	0.0229262
GO:0015991	biological_process	ATP hydrolysis coupled proton transport	0.0229262
GO:0004843	molecular_function	ubiquitin-specific protease activity	0.0229262
GO:0005741	cellular_component	mitochondrial outer membrane	0.0229262
GO:0043410	biological_process	positive regulation of MAPK cascade	0.0230397
GO:0005604	cellular_component	basement membrane	0.0230397
GO:0051056	biological_process	regulation of small GTPase mediated signal transduction	0.0230397
GO:0005215	molecular_function	transporter activity	0.0234095
GO:0007507	biological_process	heart development	0.0236304
GO:0008284	biological_process	positive regulation of cell proliferation	0.0246994
GO:0006281	biological_process	DNA repair	0.02566
GO:0005509	molecular_function	calcium ion binding	0.0262484
GO:0019904	molecular_function	protein domain specific binding	0.026876
GO:0006351	biological_process	transcription, DNA-dependent	0.0287789
GO:0043234	cellular_component	protein complex	0.0291602
GO:0008283	biological_process	cell proliferation	0.0303305
GO:0030335	biological_process	positive regulation of cell migration	0.0303305
GO:0019221	biological_process	cytokine-mediated signaling pathway	0.0321377
GO:0050840	molecular_function	extracellular matrix binding	0.0322863
GO:0006820	biological_process	anion transport	0.0322863
GO:0005765	cellular_component	lysosomal membrane	0.0322863
GO:0000977	molecular_function	RNA polymerase II regulatory region sequence-specific DNA binding	0.0322863
GO:0030374	molecular_function	ligand-dependent nuclear receptor transcription coactivator activity	0.0322863
GO:0006509	biological_process	membrane protein ectodomain proteolysis	0.0322863
GO:0001047	molecular_function	core promoter binding	0.0322863
GO:0010952	biological_process	positive regulation of peptidase activity	0.0322863
GO:0007512	biological_process	adult heart development	0.0322863
GO:0006605	biological_process	protein targeting	0.0322863
GO:0019835	biological_process	cytolysis	0.0322863
GO:0030145	molecular_function	manganese ion binding	0.0322863
GO:0045727	biological_process	positive regulation of translation	0.0322863
GO:0001158	molecular_function	enhancer sequence-specific DNA binding	0.0322863
GO:0045860	biological_process	positive regulation of protein kinase activity	0.0322863
GO:0031647	biological_process	regulation of protein stability	0.0322863
GO:0051384	biological_process	response to glucocorticoid stimulus	0.0322863
GO:0006611	biological_process	protein export from nucleus	0.0322863
GO:0021987	biological_process	cerebral cortex development	0.0322863
GO:0090190	biological_process	positive regulation of branching involved in ureteric bud morphogenesis	0.0322863
GO:0042391	biological_process	regulation of membrane potential	0.0322863
GO:0003824	molecular_function	catalytic activity	0.0324796
GO:0043066	biological_process	negative regulation of apoptotic process	0.0332482
GO:0006917	biological_process	induction of apoptosis	0.033544
GO:0005764	cellular_component	lysosome	0.0343243
GO:0003700	molecular_function	sequence-specific DNA binding transcription factor activity	0.0343494
GO:0005813	cellular_component	centrosome	0.0353317
GO:0000902	biological_process	cell morphogenesis	0.0357996
GO:0005802	cellular_component	trans-Golgi network	0.0357996
GO:0006511	biological_process	ubiquitin-dependent protein catabolic process	0.0369374
GO:0004197	molecular_function	cysteine-type endopeptidase activity	0.0375711
GO:0006979	biological_process	response to oxidative stress	0.0375711
GO:0046034	biological_process	ATP metabolic process	0.0382431
GO:0005901	cellular_component	caveola	0.0382431
GO:0001102	molecular_function	RNA polymerase II activating transcription factor binding	0.0382431
GO:0008542	biological_process	visual learning	0.0382431
GO:0042102	biological_process	positive regulation of T cell proliferation	0.0382431
GO:0004518	molecular_function	nuclease activity	0.0382431
GO:0044325	molecular_function	ion channel binding	0.0382431
GO:0034446	biological_process	substrate adhesion-dependent cell spreading	0.0382431
GO:0060173	biological_process	limb development	0.0382431
GO:0030165	molecular_function	PDZ domain binding	0.0382431
GO:0030317	biological_process	sperm motility	0.0382431
GO:0008022	molecular_function	protein C-terminus binding	0.0385693
GO:0051287	molecular_function	NAD binding	0.0392112
GO:0010629	biological_process	negative regulation of gene expression	0.0392112
GO:0031175	biological_process	neuron projection development	0.0392112
GO:0005929	cellular_component	cilium	0.0406059
GO:0051091	biological_process	positive regulation of sequence-specific DNA binding transcription factor activity	0.0406059
GO:0005759	cellular_component	mitochondrial matrix	0.0406059
GO:0018108	biological_process	peptidyl-tyrosine phosphorylation	0.0406059
GO:0001947	biological_process	heart looping	0.0409955
GO:0032760	biological_process	positive regulation of tumor necrosis factor production	0.0409955
GO:0006633	biological_process	fatty acid biosynthetic process	0.0409955
GO:0006898	biological_process	receptor-mediated endocytosis	0.0409955
GO:0006289	biological_process	nucleotide-excision repair	0.0409955
GO:0048666	biological_process	neuron development	0.0409955
GO:0004715	molecular_function	non-membrane spanning protein tyrosine kinase activity	0.0409955
GO:0032436	biological_process	positive regulation of proteasomal ubiquitin-dependent protein catabolic process	0.0409955
GO:0019903	molecular_function	protein phosphatase binding	0.0409955
GO:0045665	biological_process	negative regulation of neuron differentiation	0.0409955
GO:0001525	biological_process	angiogenesis	0.0413438
GO:0005902	cellular_component	microvillus	0.04158
GO:0005096	molecular_function	GTPase activator activity	0.04158
GO:0051015	molecular_function	actin filament binding	0.04158
GO:0030097	biological_process	hemopoiesis	0.04158
GO:0009411	biological_process	response to UV	0.0418583
GO:0007224	biological_process	smoothened signaling pathway	0.0418583
GO:0016579	biological_process	protein deubiquitination	0.0418583
GO:0006954	biological_process	inflammatory response	0.0428128
GO:0008270	molecular_function	zinc ion binding	0.0434347

## Sheet: Table S5.4
Table S5.2 KEGG significant of top 14 upregulated miRNAs
Pathway ID	Pathway Description	p-value of Fisher's Exact Test
ko01100	Metabolic pathways	7.55518e-08
ko04142	Lysosome	3.80274e-05
ko05142	Chagas disease (American trypanosomiasis)	9.73606e-05
ko05145	Toxoplasmosis	0.000103402
ko05323	Rheumatoid arthritis	0.000168259
ko04070	Phosphatidylinositol signaling system	0.000225006
ko05144	Malaria	0.000271986
ko04210	Apoptosis	0.000466824
ko04062	Chemokine signaling pathway	0.000482465
ko04110	Cell cycle	0.000907075
ko04145	Phagosome	0.000976384
ko04666	Fc gamma R-mediated phagocytosis	0.00120601
ko05222	Small cell lung cancer	0.00155302
ko00562	Inositol phosphate metabolism	0.00223714
ko04640	Hematopoietic cell lineage	0.00263917
ko04514	Cell adhesion molecules (CAMs)	0.00305418
ko04114	Oocyte meiosis	0.00309949
ko00510	N-Glycan biosynthesis	0.00394608
ko00270	Cysteine and methionine metabolism	0.00398559
ko04141	Protein processing in endoplasmic reticulum	0.00414961
ko05140	Leishmaniasis	0.00454679
ko05146	Amoebiasis	0.0049903
ko04380	Osteoclast differentiation	0.00555238
ko05212	Pancreatic cancer	0.00647463
ko04966	Collecting duct acid secretion	0.00650799
ko05220	Chronic myeloid leukemia	0.0075805
ko05215	Prostate cancer	0.00777013
ko05221	Acute myeloid leukemia	0.00782385
ko05410	Hypertrophic cardiomyopathy (HCM)	0.00829076
ko05210	Colorectal cancer	0.00937493
ko00140	Steroid hormone biosynthesis	0.0105179
ko04670	Leukocyte transendothelial migration	0.0107618
ko00052	Galactose metabolism	0.0121175
ko05213	Endometrial cancer	0.0134
ko04510	Focal adhesion	0.0138359
ko05412	Arrhythmogenic right ventricular cardiomyopathy (ARVC)	0.0177678
ko00520	Amino sugar and nucleotide sugar metabolism	0.0187893
ko04664	Fc epsilon RI signaling pathway	0.0187893
ko05414	Dilated cardiomyopathy	0.0206917
ko04930	Type II diabetes mellitus	0.0237661
ko05100	Bacterial invasion of epithelial cells	0.0262082
ko04662	B cell receptor signaling pathway	0.0273648
ko00564	Glycerophospholipid metabolism	0.0296964
ko04914	Progesterone-mediated oocyte maturation	0.030364
ko00604	Glycosphingolipid biosynthesis - ganglio series	0.0326448
ko00240	Pyrimidine metabolism	0.0328313
ko00900	Terpenoid backbone biosynthesis	0.037085
ko04660	T cell receptor signaling pathway	0.0388055
ko04150	mTOR signaling pathway	0.0404753
ko04350	TGF-beta signaling pathway	0.0404904
ko04730	Long-term depression	0.0441576
ko04370	VEGF signaling pathway	0.0493711
ko04010	MAPK signaling pathway	0.0494288
